# Supplementary material for: A facile synthesis of β-amino carbonyl compounds through an aza-Michael addition reaction under solvent-free conditions
Source: Royal Society of Chemistry journal article supplement (doi:10.1039/c3ra46789a), 2014-01-01
Supplement: c3ra46789a.pdf [file c3ra46789a.pdf]

## A facile synthesis of $\beta$ -amino carbonyl compounds through an aza-Michael addition reaction under solvent-free conditions

Chao Huang,<sup>\*ab</sup> Yanqing Yin,<sup>a</sup> Jiahui Guo,<sup>a</sup> Jiong Wang,<sup>ab</sup> Baomin Fan,<sup>ab</sup> Lijuan Yang<sup>\*ab</sup>

<sup>a</sup>Key Laboratory of Chemistry in Ethnic Medicinal Resources, State Ethnic Affairs Commission & Ministry of Education, Yunnan University of Nationalities, Kunming, 650500, China

<sup>b</sup>Engineering Research Center of Biopolymer Functional Materials of Yunnan, Yunnan University of Nationalities, Kunming, 650500, China

\*Corresponding author. Tel.: +86 871 65910017; fax: +86 871 65910017.

E-mail: huang.chao@hotmail.com (C. Huang)

### Supporting Information

#### Table of Contents

|                                                                                               |    |
|-----------------------------------------------------------------------------------------------|----|
| General Method.....                                                                           | 2  |
| General Procedure for the Synthesis of oxanorbornene $\beta$ -amino esters <b>3</b> .....     | 3  |
| General Procedure for the Synthesis of $\beta$ -enamine esters <b>4</b> .....                 | 3  |
| Synthesis of $\beta$ -amino carbonyl compounds <b>3h</b> and <b>4a</b> .....                  | 3  |
| <sup>1</sup> H and <sup>13</sup> C NMR Spectra of Compounds <b>3a-3k</b> , <b>4a-4f</b> ..... | 5  |
| References.....                                                                               | 20 |

## General Method

All compounds were fully characterized by spectroscopic techniques. The NMR spectra were recorded on a Bruker-Avance 400 MHz spectrometer ( $^1\text{H}$ : 400 MHz,  $^{13}\text{C}$ : 100 MHz) with tetramethylsilane (TMS) as the internal standard ( $\delta$  0.0 ppm), chemical shifts ( $\delta$ ) are expressed in ppm, and  $J$  values are given in Hz. Deuterated  $\text{CDCl}_3$  was used as a solvent. IR spectra were recorded on a FT-IR Thermo Nicolet Avatar 360 using a KBr pellet. The reactions were monitored by thin layer chromatography (TLC) using neutral alumina. The melting points were determined on an XT-4A melting point apparatus and are uncorrected. HRMS was performed on an Agilent LC-MSD TOF instrument.

All chemicals and solvents were used as received without further purification unless otherwise stated. Column chromatography was performed on neutral alumina.

### Preparation of diethyl 7-oxabicyclo[2.2.1]hepta-2,5-diene-2,3-dicarboxylate **1**.

Diethyl acetylenedicarboxylate 12 mmol and furan 60 mmol were placed in a sealed tube, which was heated at 100 °C for 20 hours. The reaction mixture was distilled under vacuum. The endoxide was obtained as a light yellow oil.<sup>1</sup>

### General Procedure for the Synthesis of oxanorbornene $\beta$ -amino esters **3**.

A schlenk was charged with **1** (0.4 mmol, 95.3 mg), amine **2** (0.8 mmol), and the solution was stirred for 1 minute to 6 days at room temperature until the **1** was completely consumed. The mixture was purified by flash column chromatography. The desired compounds (**3a–3j**) were formed from **1** in yields: 54-97%.

### General Procedure for the Synthesis of $\beta$ -enamine esters **4**.

A Schlenk was charged with diethyl 7-oxabicyclo[2.2.1]hepta-2,5-diene-2,3-dicarboxylate **1** (0.4 mmol, 95.3 mg), amine **2** (0.8 mmol), and the solution was stirred for 1 minute to 6 days at 90 °C until **1** was completely consumed. The mixture was purified by flash column chromatography. The desired compounds **4** were formed from **1** in yields 42-77%.

### Synthesis of $\beta$ -amino carbonyl compounds **3h** and **4a**

The  $\beta$ -amino carbonyl compound **4a** was prepared during the formation of  $\beta$ -amino carbonyl compound **3h**. According to experimental results (scheme 1), **4a** and **5** can be obtained directly with 42% yield from oxabornene **1** and aniline **2a** under room temperature without reagent and catalyst. Also, compound **4a** and **5** were obtained from thermal degradation of **3h** at 90 °C, identified by spectroscopy.

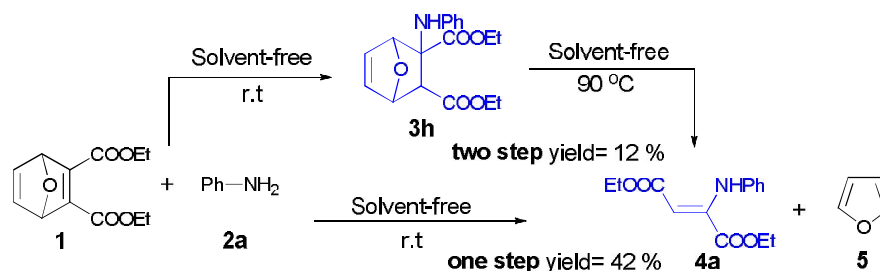

Scheme 1. Synthesis of  $\beta$ -amino carbonyl compounds **3h** and **4a**

**Diethyl 2-(phenylamino)-7-oxabicyclo[2.2.1]hept-5-ene-2,3-dicarboxylate (3h):**

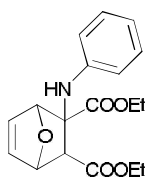

Yield 62%; White solid; mp: 107-108 °C; IR (KBr) ( $\nu_{\max}$ ,  $\text{cm}^{-1}$ ) 3385, 2974, 2331, 1735, 1604, 1511, 1449, 1377, 1321, 1254, 1062, 1011, 859, 749, 689, 551  $\text{cm}^{-1}$ ;  $^1\text{H}$  NMR (400 MHz,  $\text{CDCl}_3$ ):  $\delta$  7.26-7.16 (2H, m), 6.84-6.80 (4H, m), 6.47-6.46 (1H, dd,  $J = 5.8, 1.9$  Hz), 5.15-5.14 (1H, m), 5.06-5.05 (1H, m), 4.41 (1H, s), 4.20-4.09 (4H, m), 3.19 (1H, d,  $J = 4.4$  Hz), 1.30 (3H, t,  $J = 7.2$  Hz), 1.15 (3H, t,  $J = 7.1$  Hz);  $^{13}\text{C}$  NMR (100 MHz,  $\text{CDCl}_3$ ):  $\delta$  170.6, 169.8, 144.9, 138.3, 132.3, 129.1, 119.5, 115.8, 86.5, 80.6, 72.4, 61.9, 61.2, 58.2, 14.1, 14.0. HRMS (TOF  $\text{ES}^+$ ):  $m/z$  calcd for  $\text{C}_{18}\text{H}_{22}\text{NO}_5^+$  [(M+H) $^+$ ], 332.1492; found, 332.1483.

**Diethyl 2-(phenylamino)maleate (4a):**

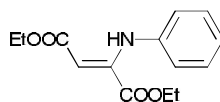

Yield 77%; Yellow oil; IR (KBr) ( $\nu_{\max}$ ,  $\text{cm}^{-1}$ ) 3279, 2984, 2344, 1735, 1668, 1607, 1498, 1382, 1274, 1208, 1137, 1039, 861, 755, 693, 553  $\text{cm}^{-1}$ ;  $^1\text{H}$  NMR (400 MHz,  $\text{CDCl}_3$ ):  $\delta$  9.68 (1H, s), 7.30-7.25 (2H, m), 7.11-7.07 (1H, m), 6.92 (2H, d,  $J = 7.7$  Hz), 5.38 (1H, s), 4.22-4.13 (4H, m), 1.30 (3H, t,  $J = 7.1$  Hz), 1.09 (3H, t,  $J = 7.1$  Hz);  $^{13}\text{C}$  NMR (100 MHz,  $\text{CDCl}_3$ ):  $\delta$  169.7, 164.5, 148.5, 140.5, 129.2, 124.3, 121.1, 93.9, 62.2, 60.1, 14.5, 13.7. HRMS (TOF  $\text{ES}^+$ ):  $m/z$  calcd for  $\text{C}_{14}\text{H}_{17}\text{NO}_4\text{Na}^+$  [(M+Na) $^+$ ], 286.1050; found, 286.1055.

### $^1\text{H}$ and $^{13}\text{C}$ NMR Spectra of Compounds 3a-3k, 4a-4f

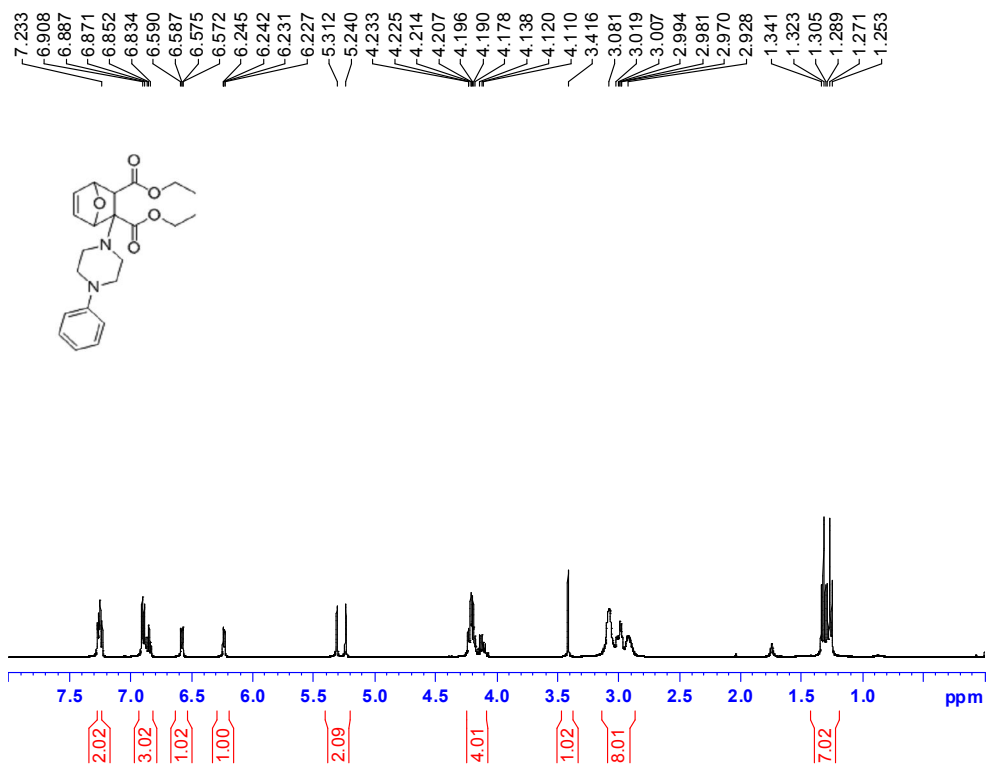

Figure 1  $^1\text{H}$  NMR (400 MHz,  $\text{CDCl}_3$ ) spectra of compound 3a

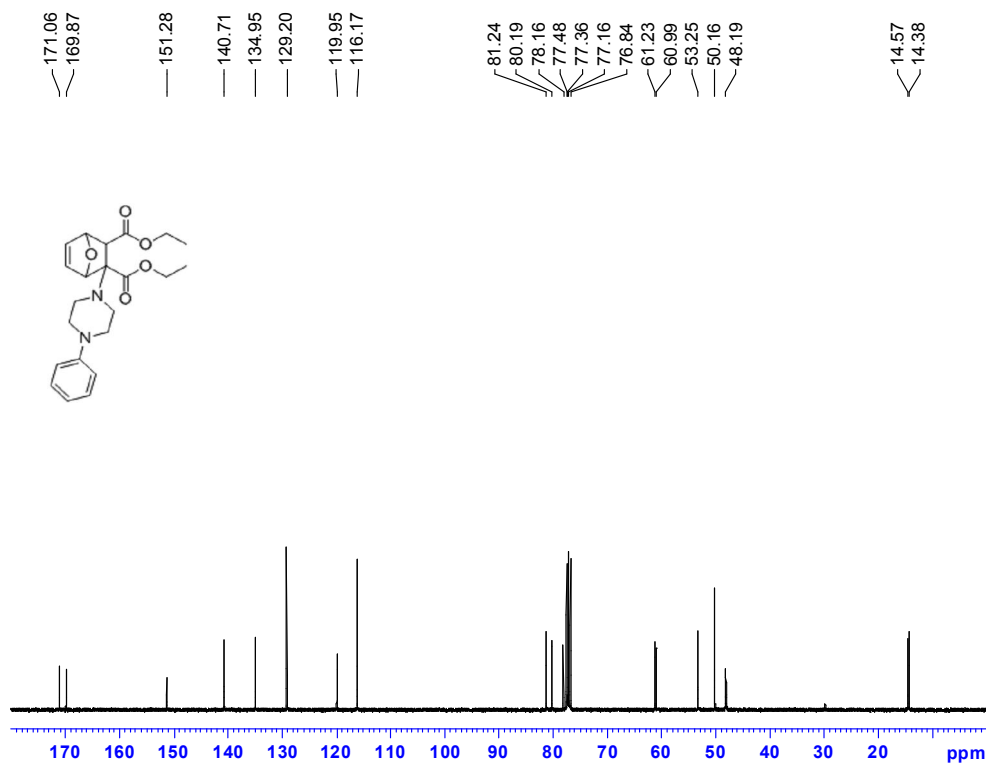

Figure 2  $^{13}\text{C}$  NMR (100 MHz,  $\text{CDCl}_3$ ) spectra of compound 3a

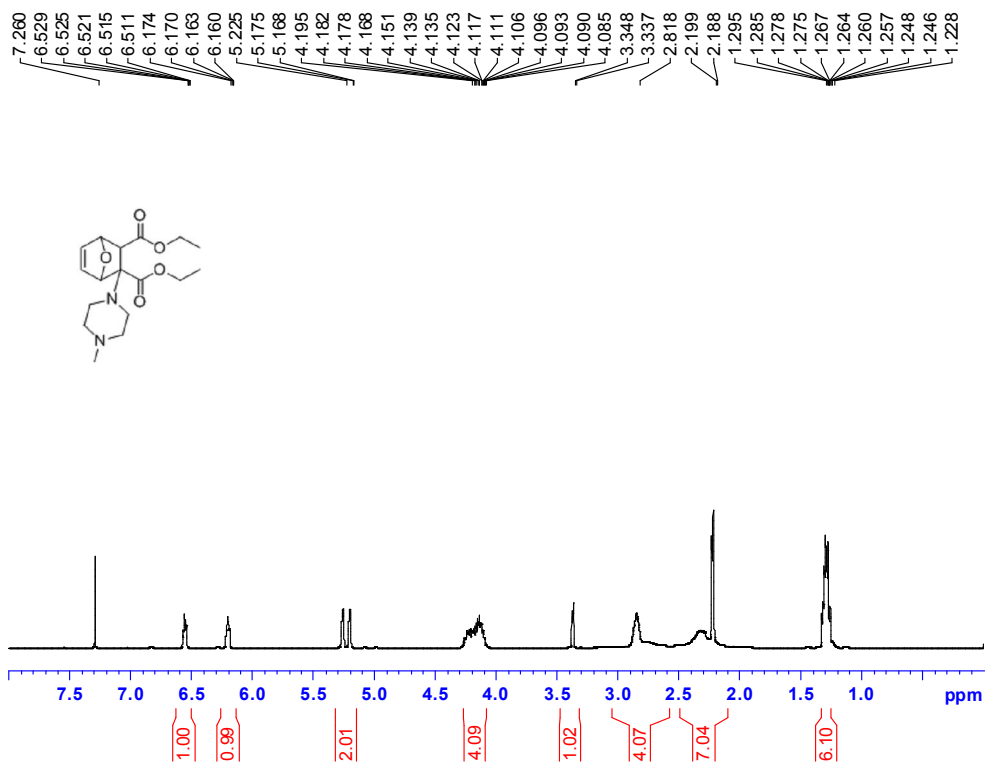

Figure 3 <sup>1</sup>H NMR (400 MHz, CDCl<sub>3</sub>) spectra of compound 3b

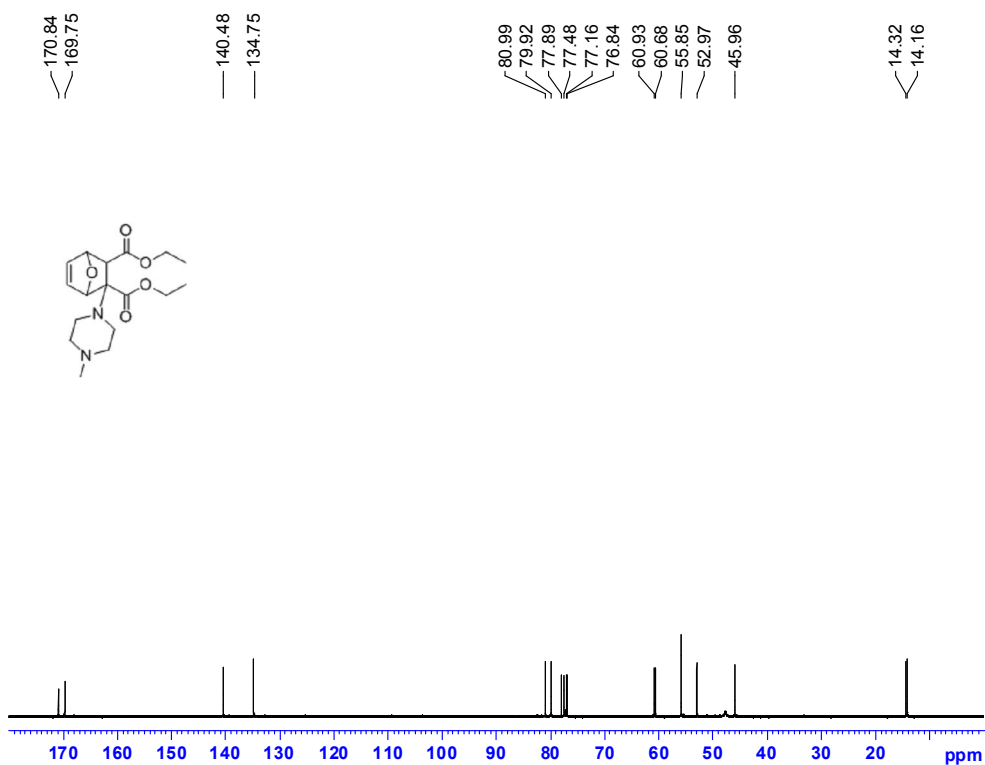

Figure 4 <sup>13</sup>C NMR (100 MHz, CDCl<sub>3</sub>) spectra of compound 3b

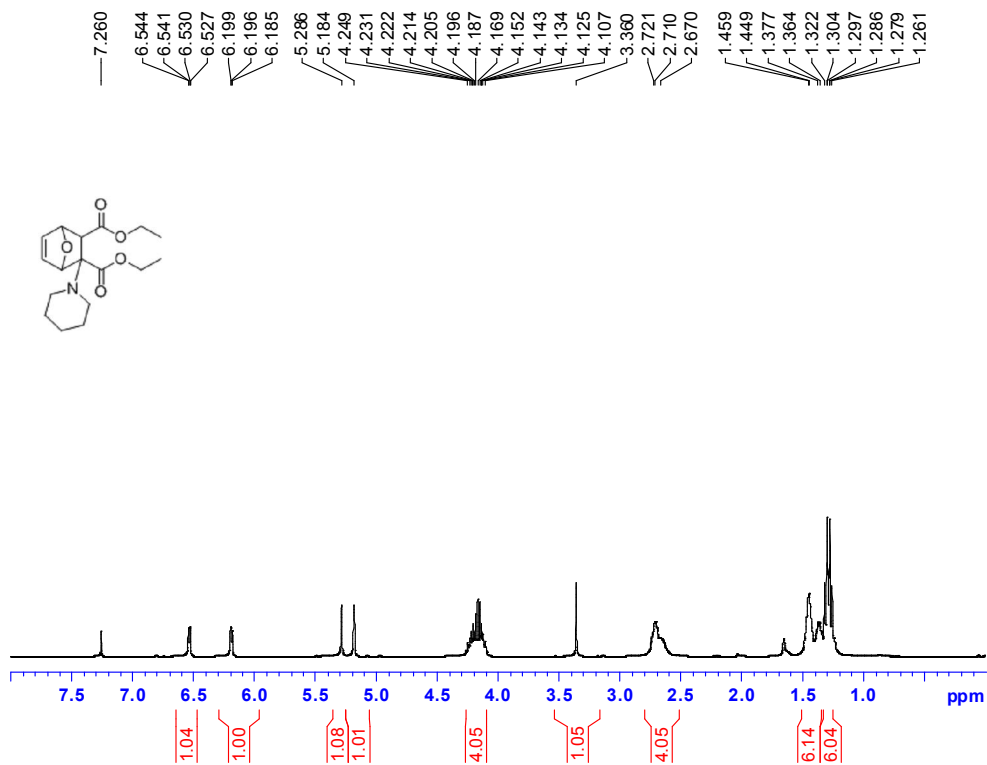

Figure 5 <sup>1</sup>H NMR (400 MHz, CDCl<sub>3</sub>) spectra of compound 3c

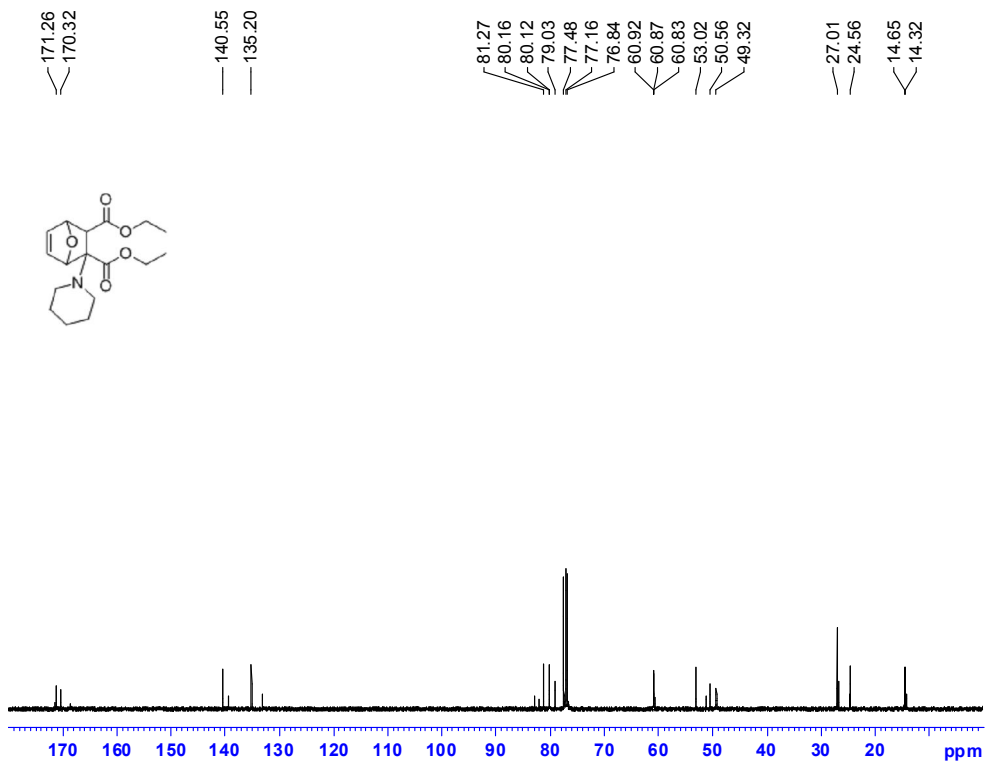

Figure 6 <sup>13</sup>C NMR (100 MHz, CDCl<sub>3</sub>) spectra of compound 3c

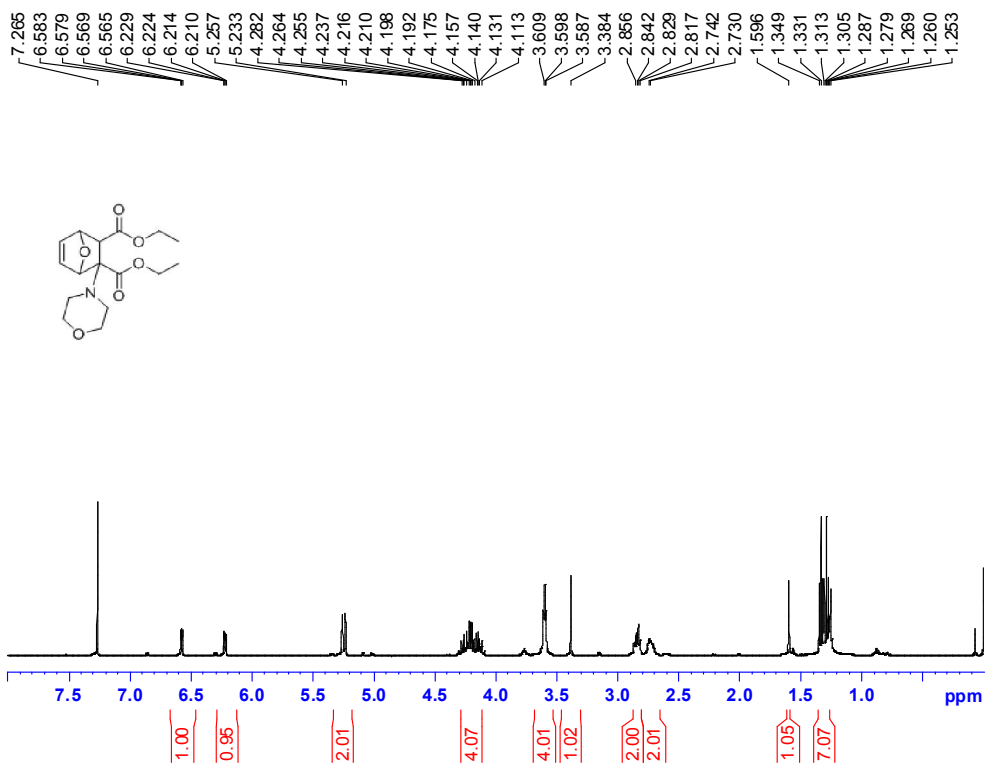

**Figure 7**  $^1\text{H}$  NMR (400 MHz,  $\text{CDCl}_3$ ) spectra of compound **3d**

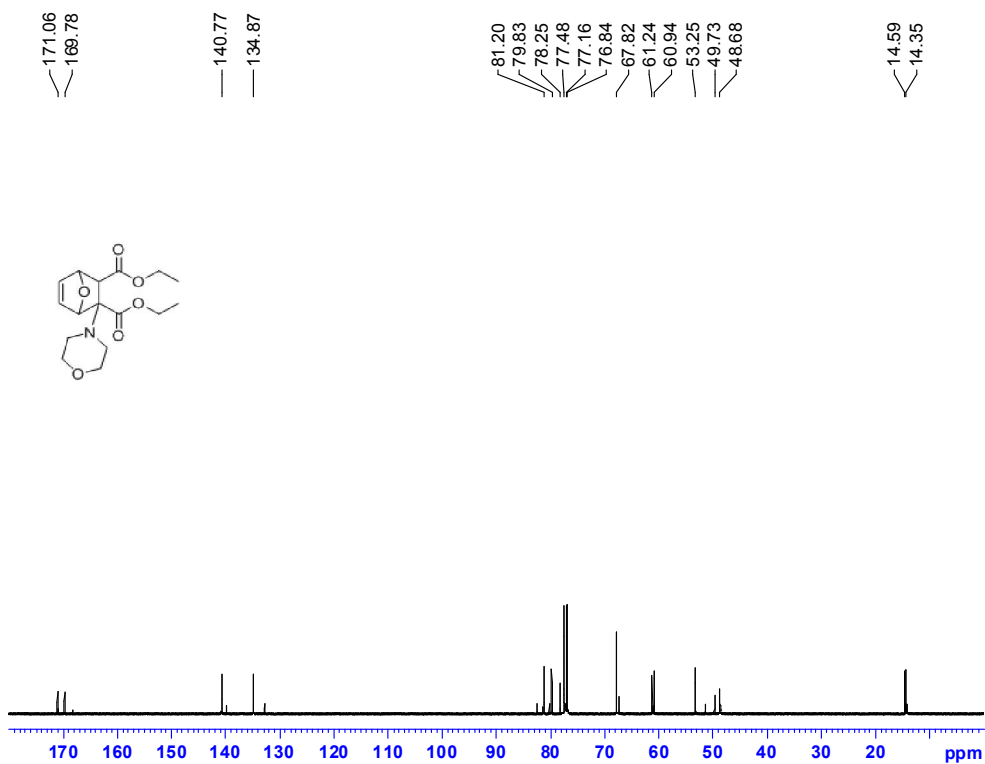

**Figure 8**  $^{13}\text{C}$  NMR (100 MHz,  $\text{CDCl}_3$ ) spectra of compound **3d**



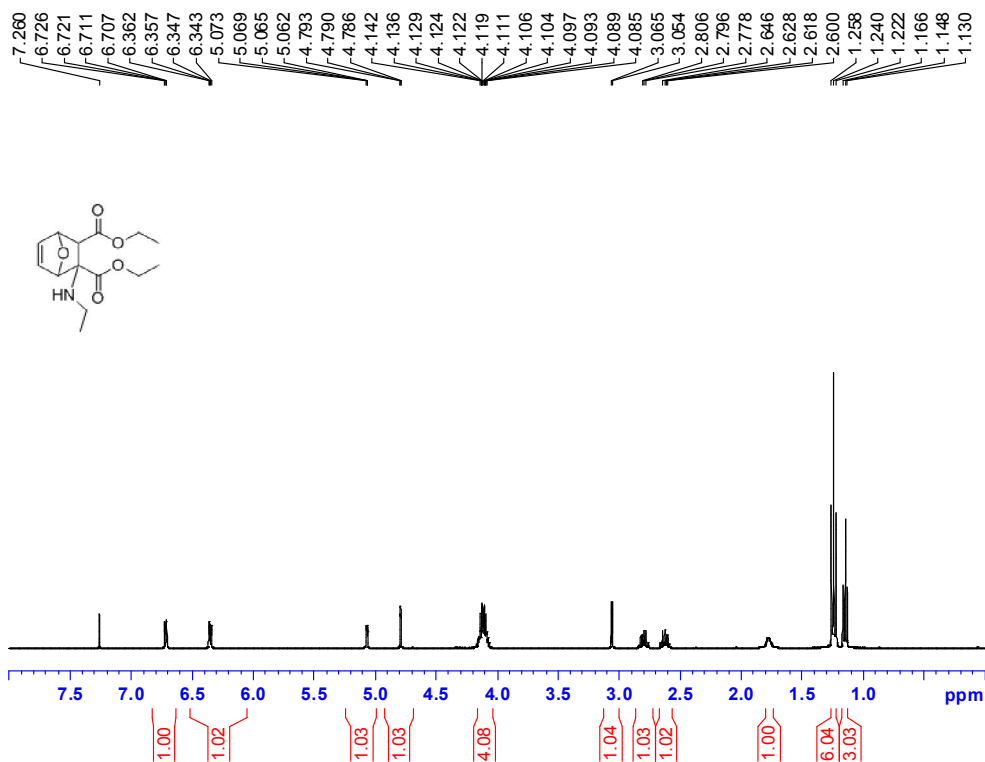

**Figure 9**  $^1\text{H}$  NMR (400 MHz,  $\text{CDCl}_3$ ) spectra of compound **3e**

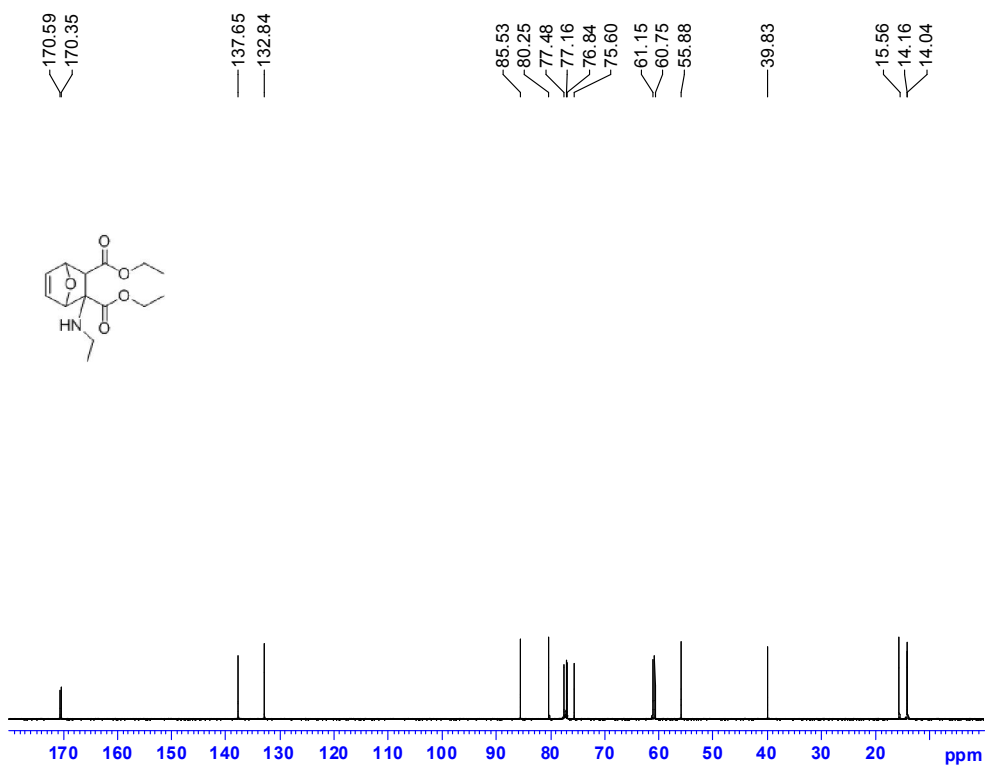

**Figure 10**  $^{13}\text{C}$  NMR (100 MHz,  $\text{CDCl}_3$ ) spectra of compound **3e**

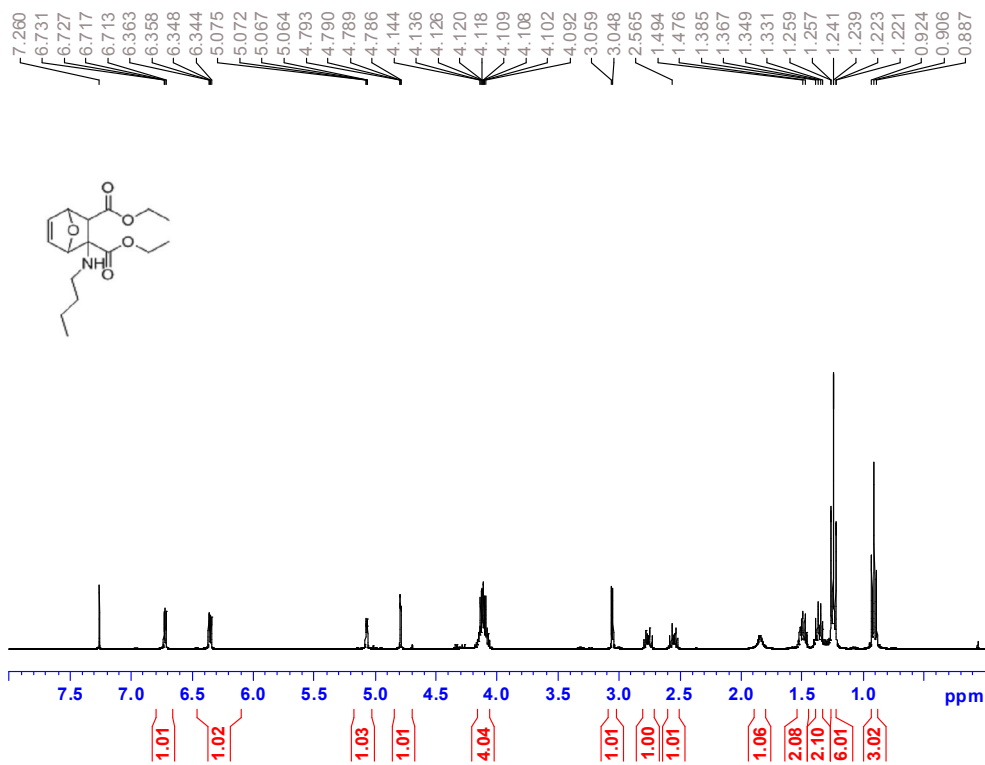

Figure 11 <sup>1</sup>H NMR (400 MHz, CDCl<sub>3</sub>) spectra of compound 3f

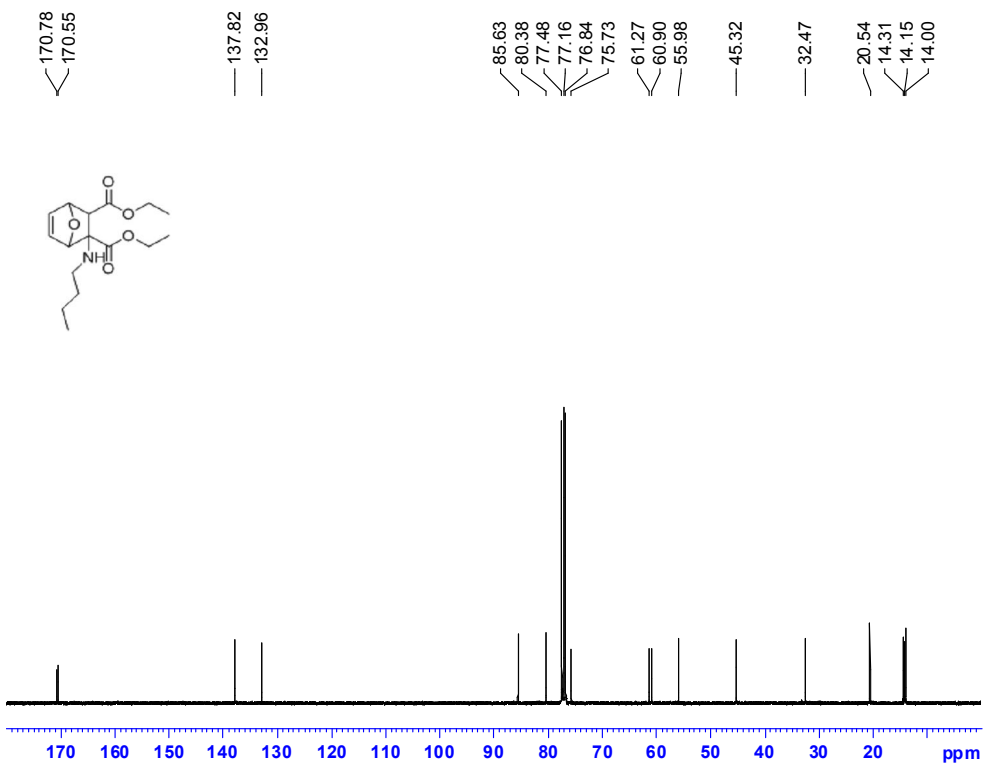

Figure 12 <sup>13</sup>C NMR (100 MHz, CDCl<sub>3</sub>) spectra of compound 3f

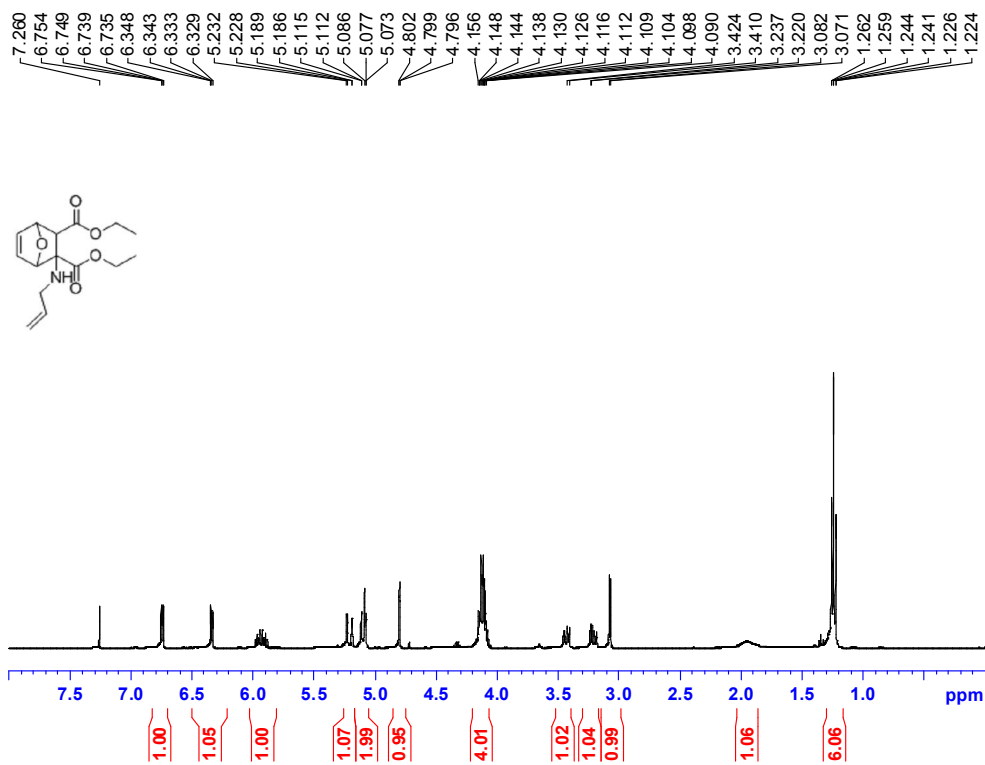

Figure 13  $^1\text{H NMR}$  (400 MHz,  $\text{CDCl}_3$ ) spectra of compound 3g

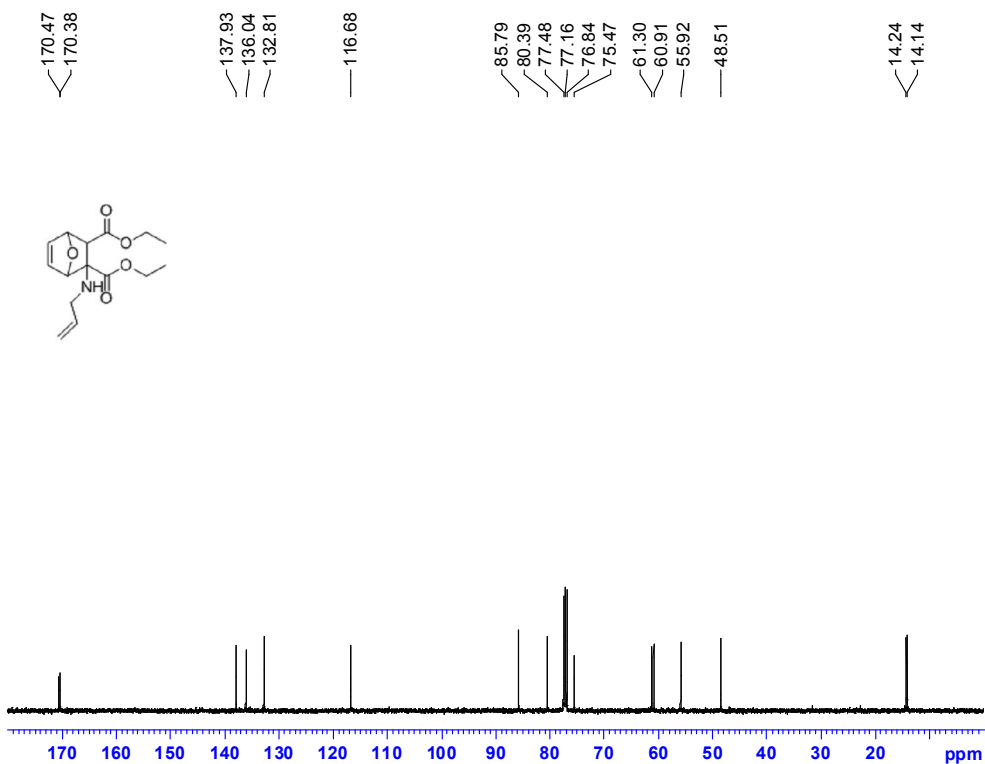

Figure 14  $^{13}\text{C NMR}$  (100 MHz,  $\text{CDCl}_3$ ) spectra of compound 3g

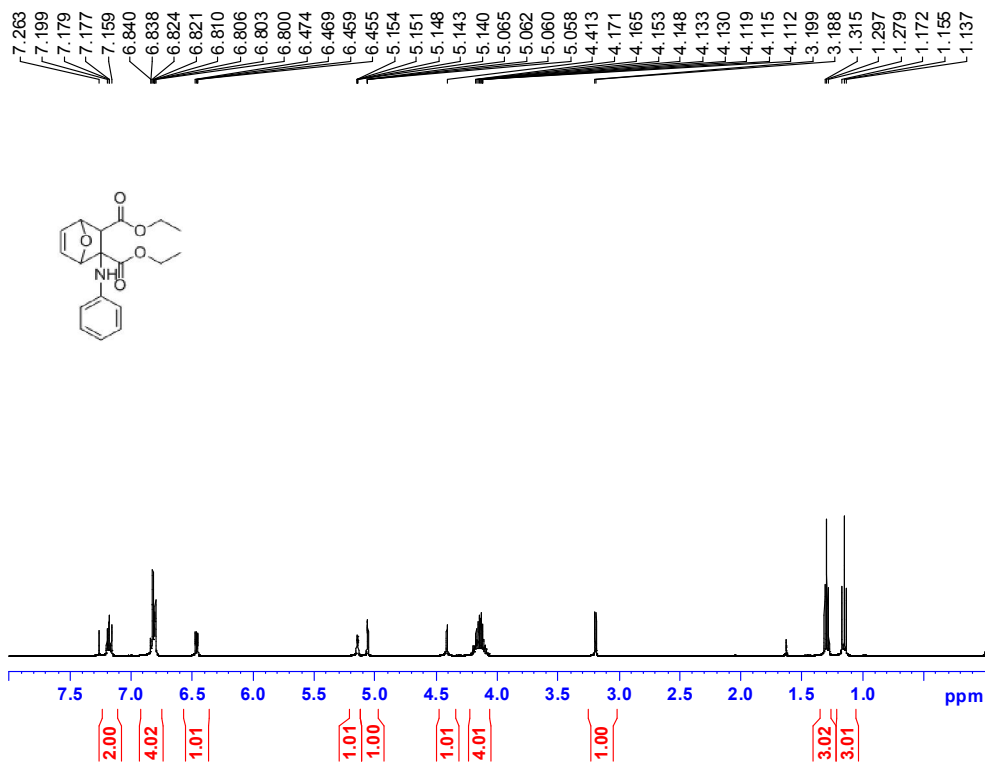

**Figure 15**  $^1\text{H}$  NMR (400 MHz,  $\text{CDCl}_3$ ) spectra of compound **3h**

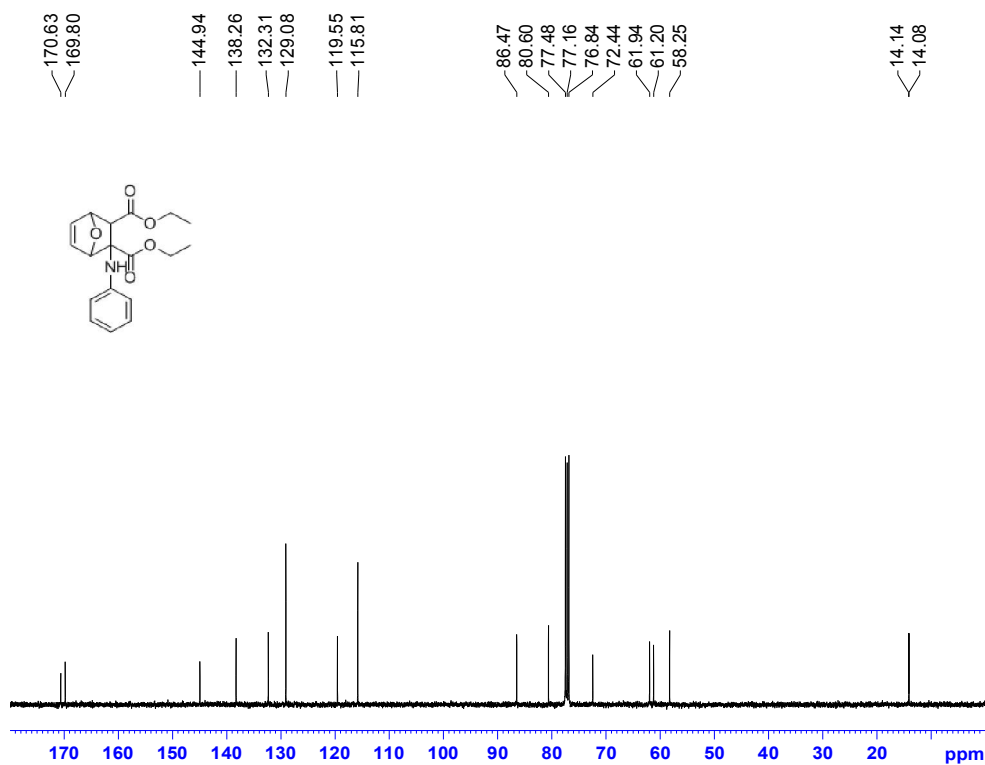

**Figure 16**  $^{13}\text{C}$  NMR (100 MHz,  $\text{CDCl}_3$ ) spectra of compound **3h**

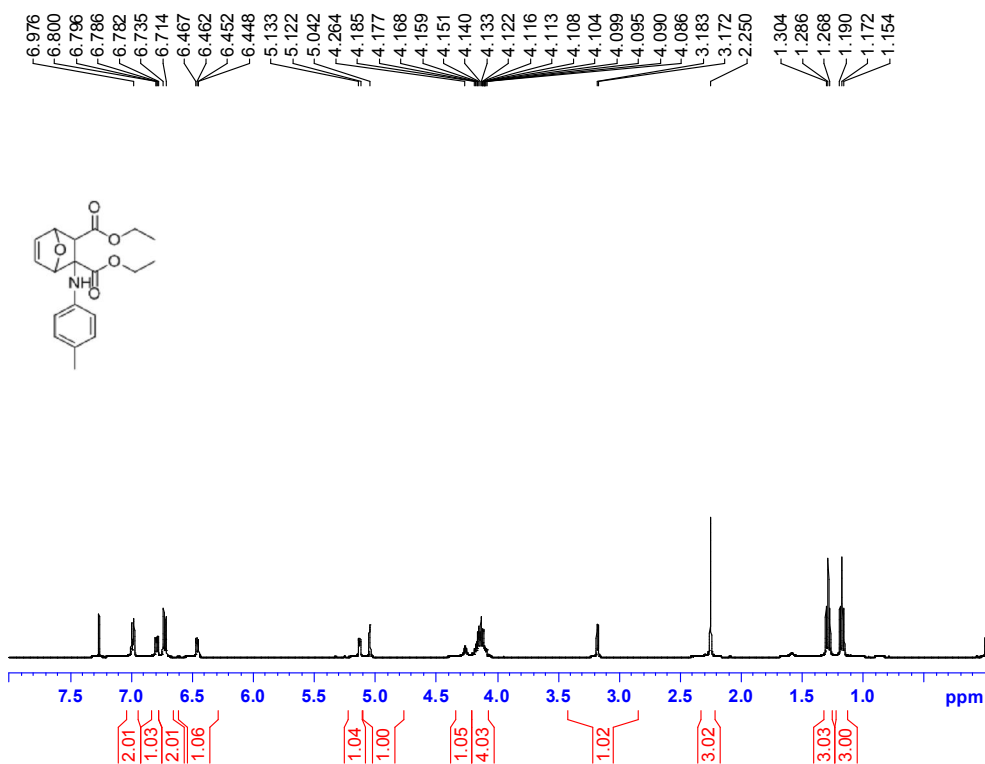

Figure 17 <sup>1</sup>H NMR (400 MHz, CDCl<sub>3</sub>) spectra of compound 3i

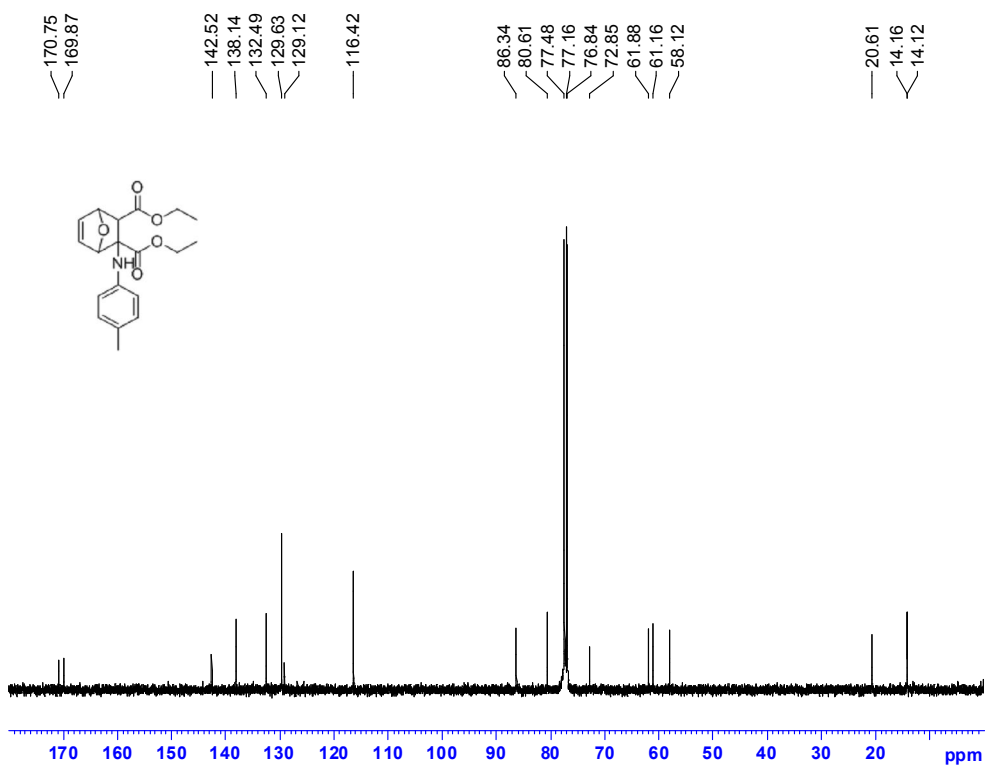

Figure 18 <sup>13</sup>C NMR (100 MHz, CDCl<sub>3</sub>) spectra of compound 3i

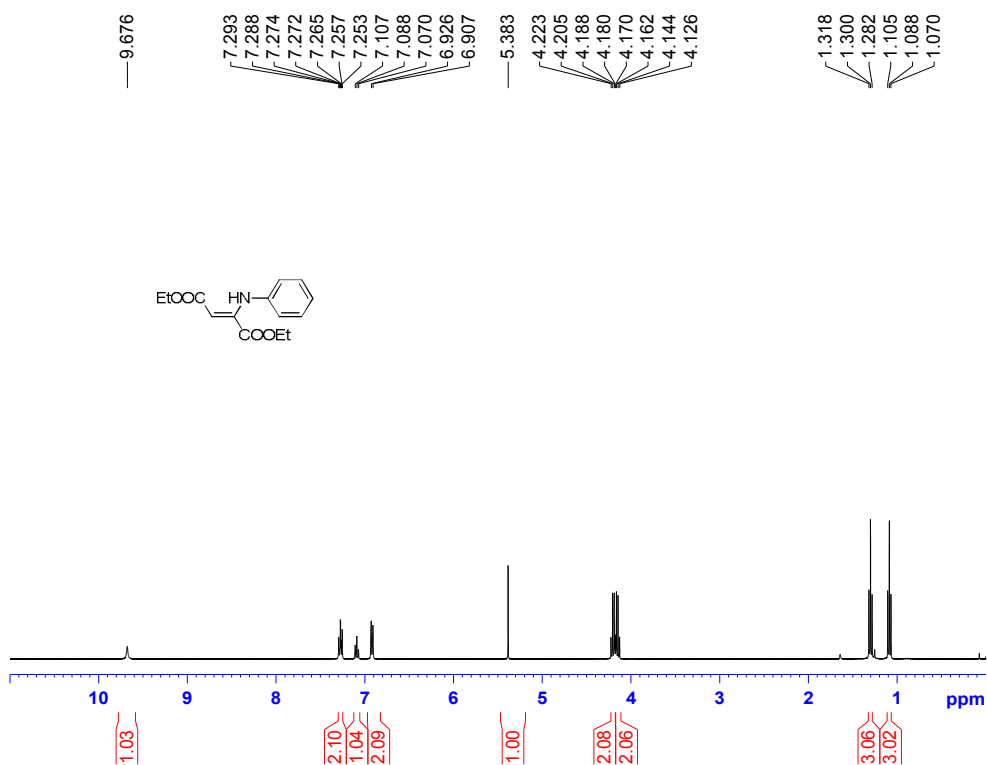

Figure 19 <sup>1</sup>H NMR (400 MHz, CDCl<sub>3</sub>) spectra of compound 4a

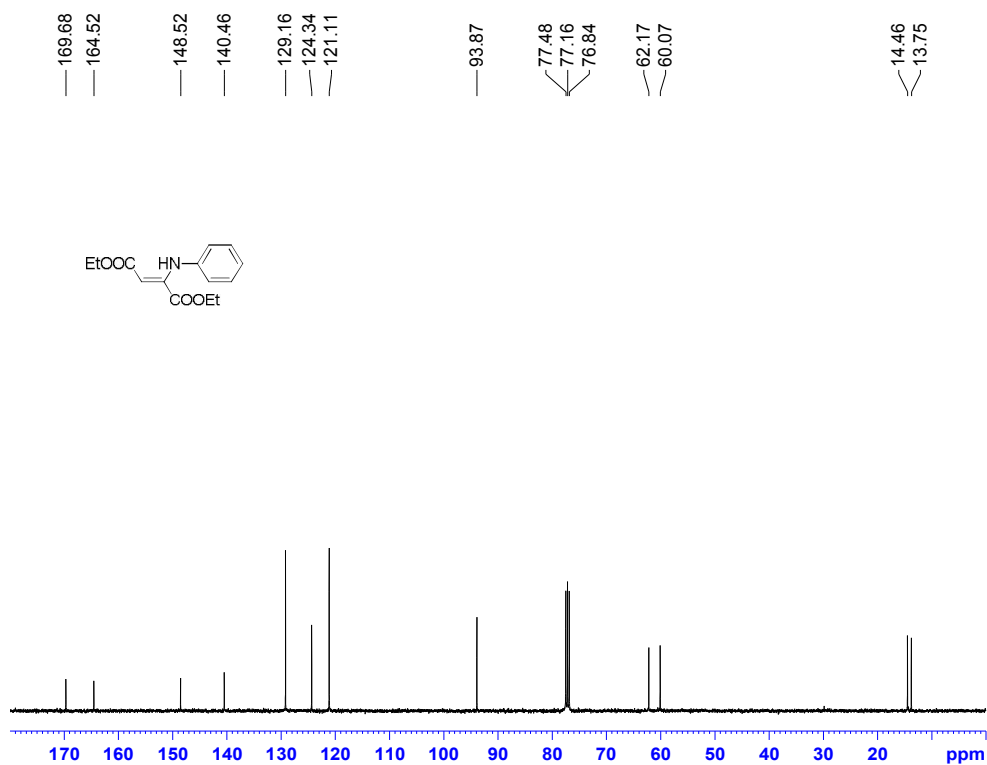

Figure 20 <sup>13</sup>C NMR (100 MHz, CDCl<sub>3</sub>) spectra of compound 4a

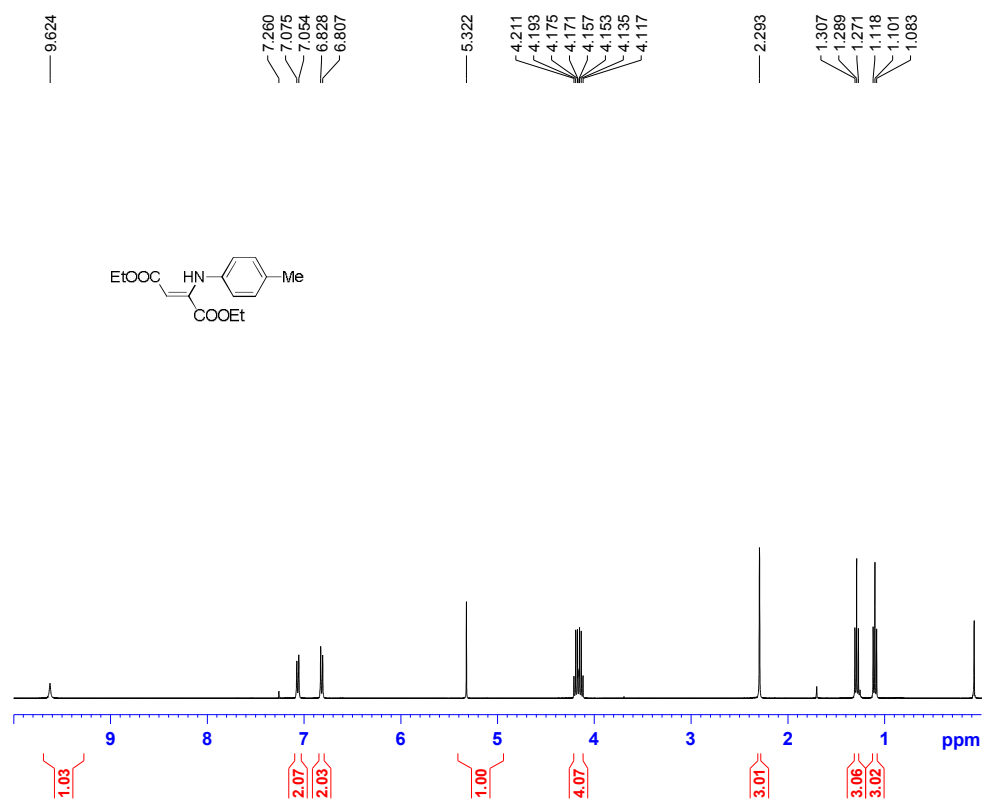

Figure 21 <sup>1</sup>H NMR (400 MHz, CDCl<sub>3</sub>) spectra of compound 4b

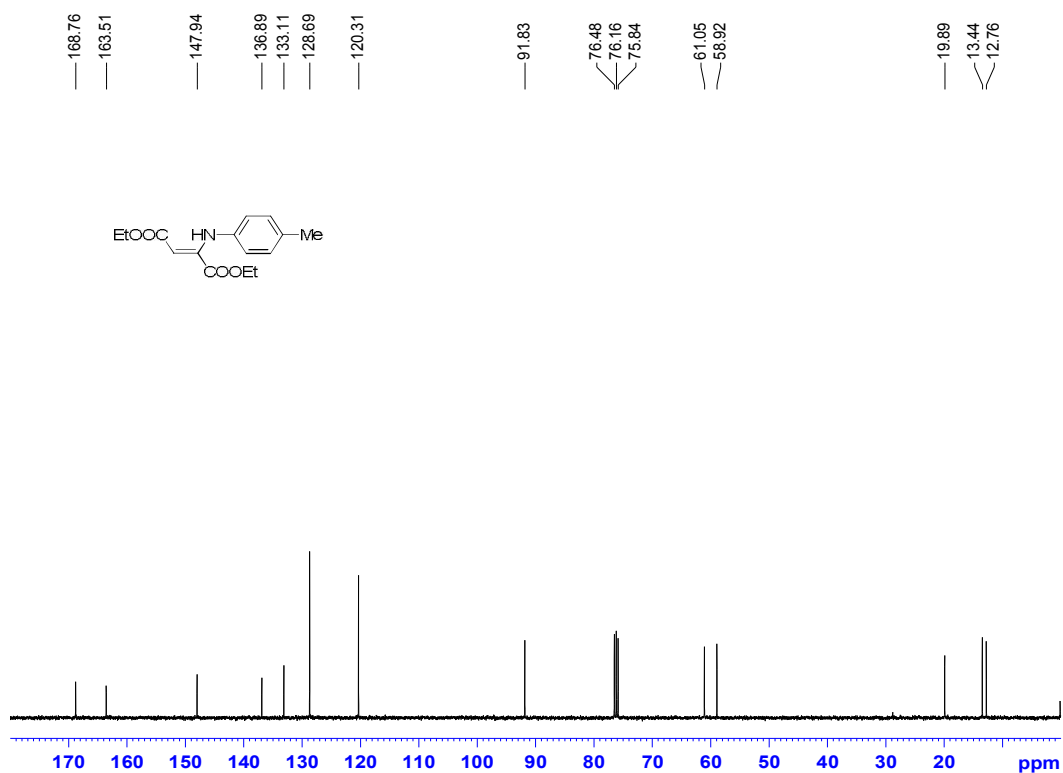

Figure 22 <sup>13</sup>C NMR (100 MHz, CDCl<sub>3</sub>) spectra of compound 4b

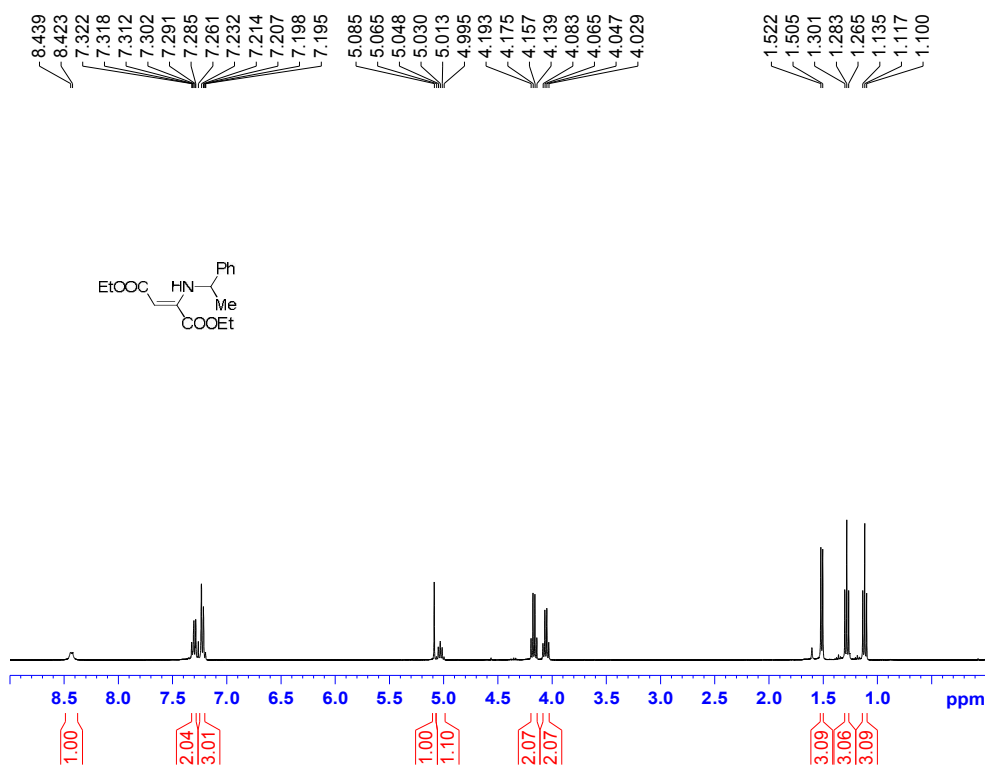

Figure 23 <sup>1</sup>H NMR (400 MHz, CDCl<sub>3</sub>) spectra of compound 4c

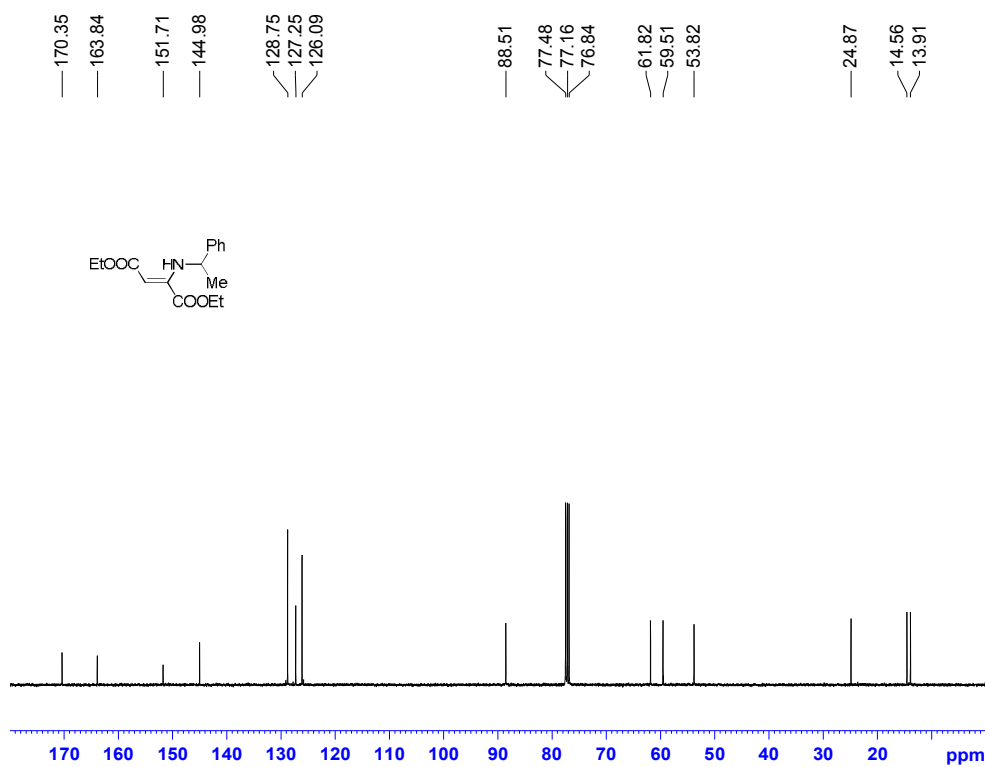

Figure 24 <sup>13</sup>C NMR (100 MHz, CDCl<sub>3</sub>) spectra of compound 4c



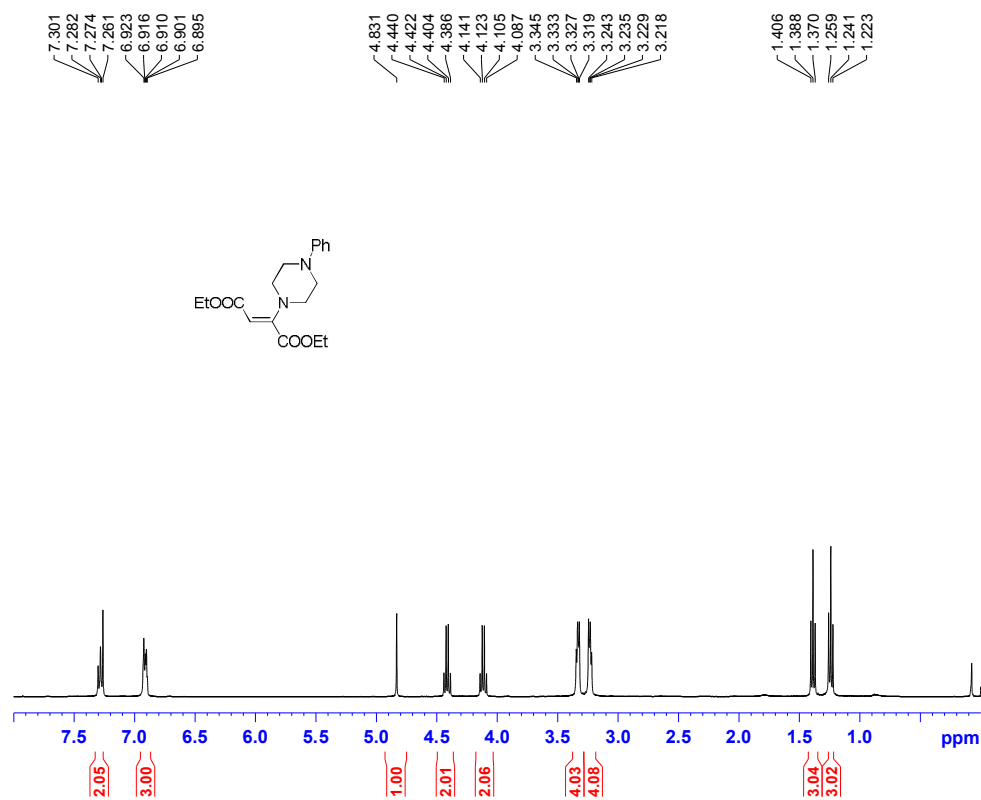

Figure 25 <sup>1</sup>H NMR (400 MHz, CDCl<sub>3</sub>) spectra of compound 4d

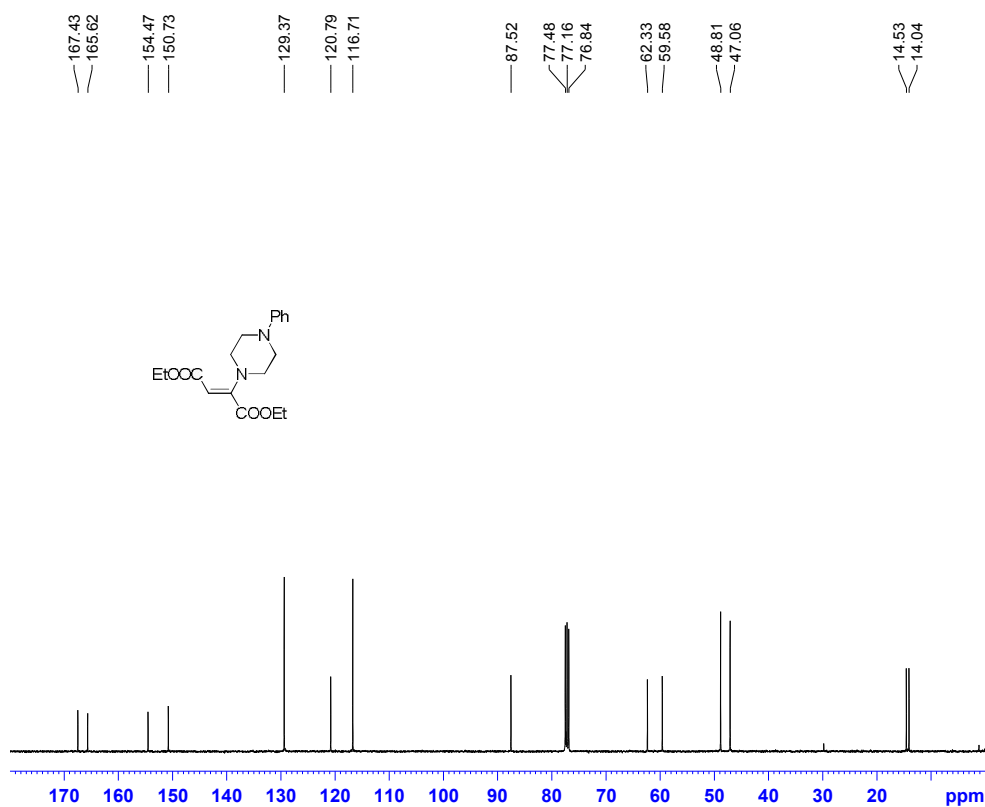

Figure 26 <sup>13</sup>C NMR (100 MHz, CDCl<sub>3</sub>) spectra of compound 4d

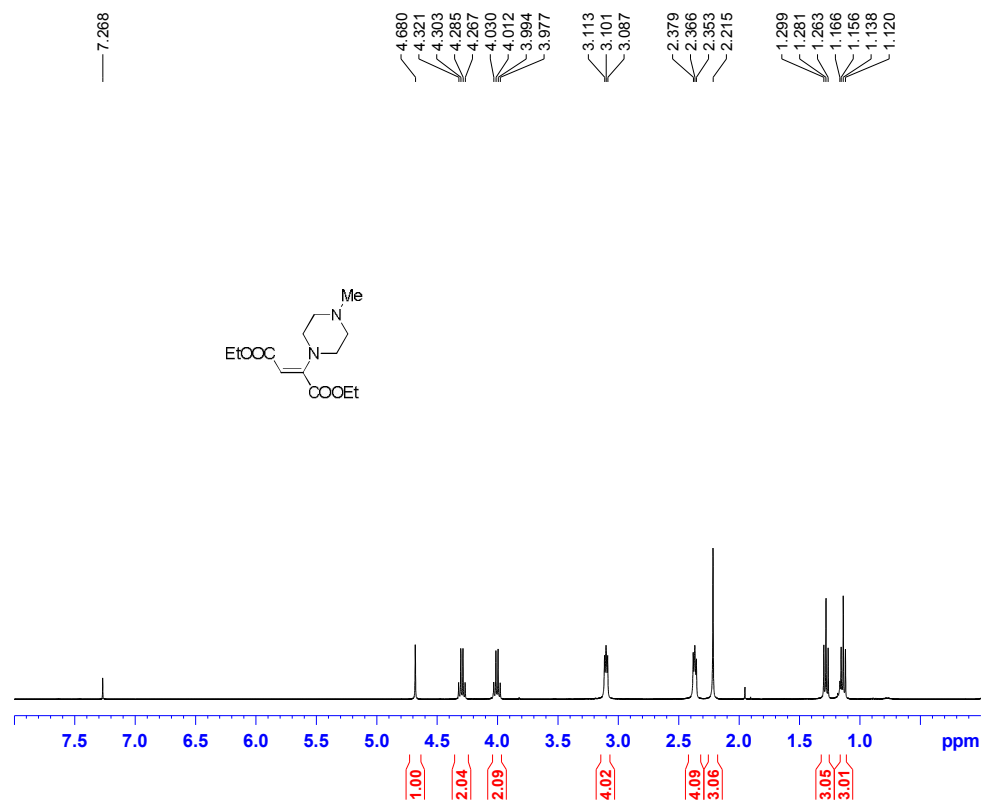

Figure 27 <sup>1</sup>H NMR (400 MHz, CDCl<sub>3</sub>) spectra of compound 4e

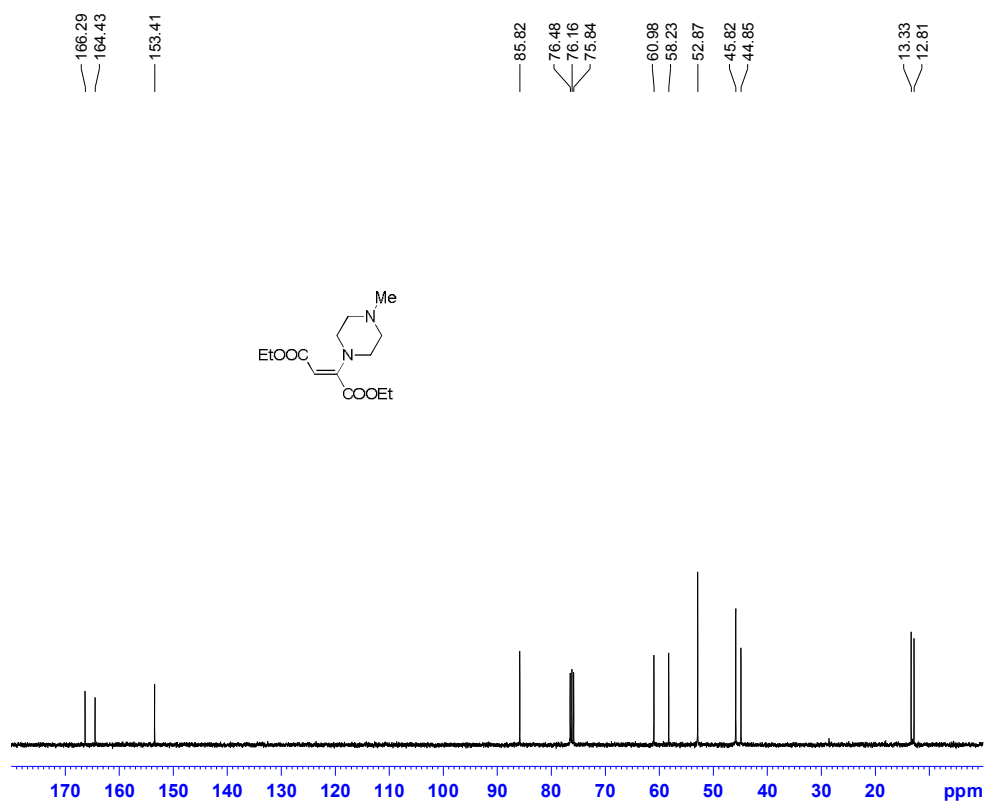

Figure 28 <sup>13</sup>C NMR (100 MHz, CDCl<sub>3</sub>) spectra of compound 4e

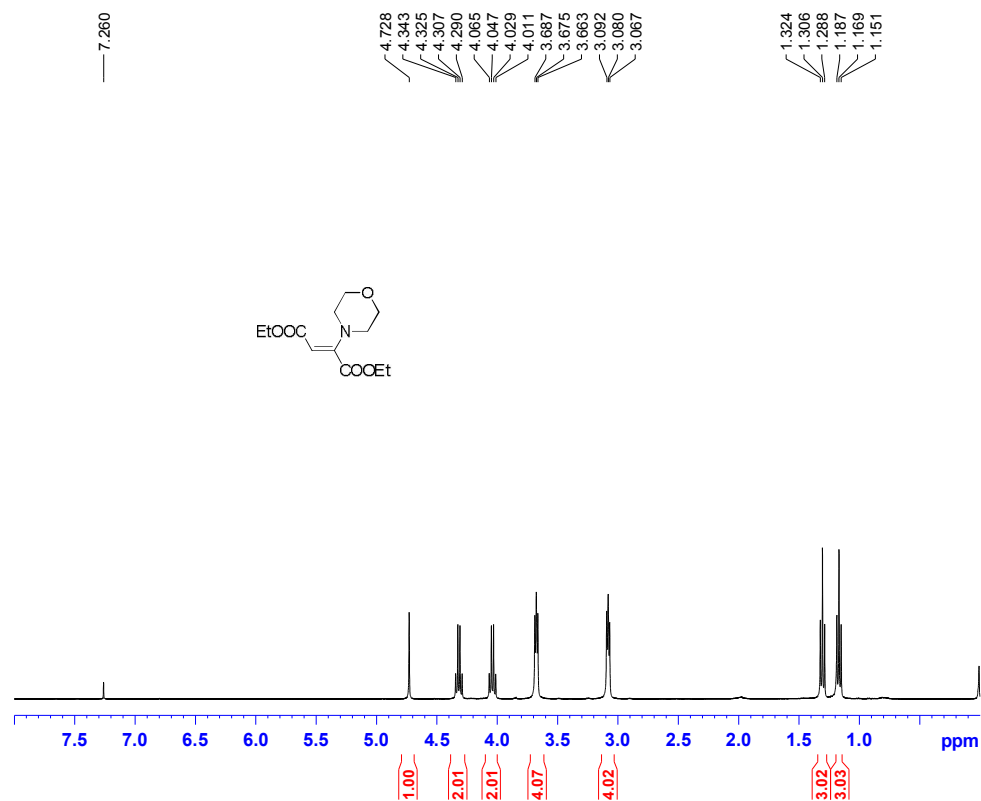

Figure 29 <sup>1</sup>H NMR (400 MHz, CDCl<sub>3</sub>) spectra of compound 4f

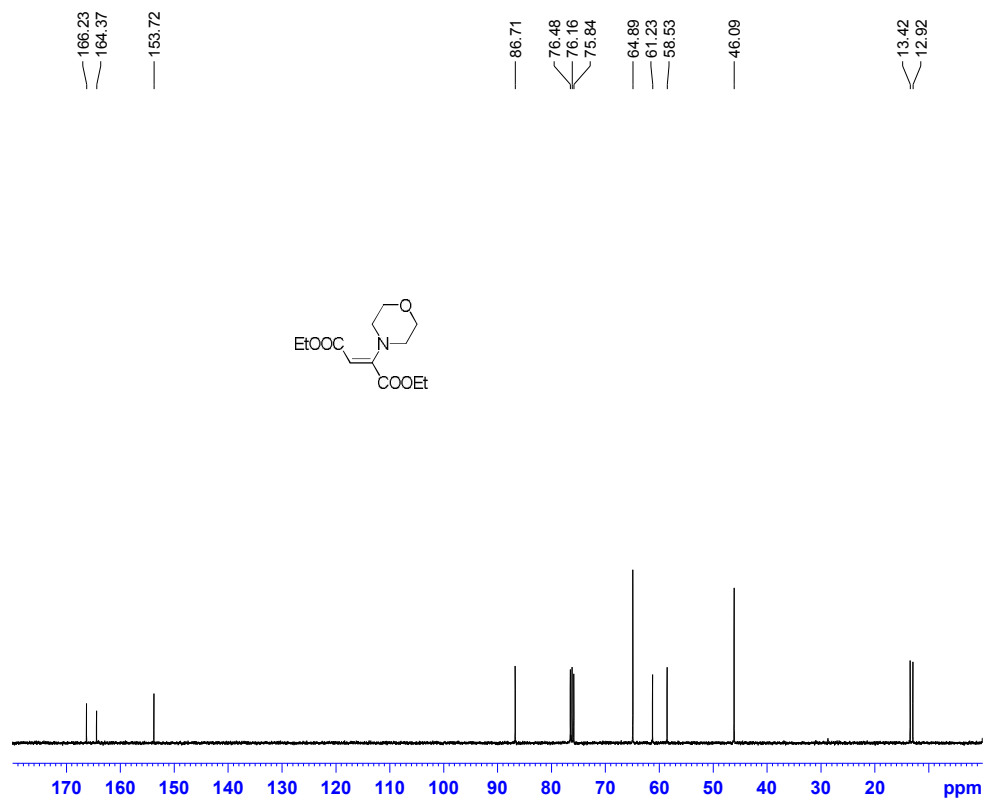

Figure 30 <sup>13</sup>C NMR (100 MHz, CDCl<sub>3</sub>) spectra of compound 4f

## References

1. N. E. Leadbeater, S. J. Pillsbury, E. Shanahan, V. A. Williams, *Tetrahedron*, 2005, **61**, 3565.
